# Supplementary material for: Preliminary indoor evidences of microplastic effects on freshwater benthic macroinvertebrates
Source: PubMed Central journal article supplement (PMC7803787; doi:10.1038/s41598-020-80606-5), 2021-01-12
Supplement: 41598_2020_80606_MOESM1_ESM.pdf [file 41598_2020_80606_MOESM1_ESM.pdf]

## Supplementary Information

### Preliminary indoor evidences of microplastic effects on freshwater benthic macroinvertebrates

Luca Gallitelli<sup>1</sup>, Alessandra Cera<sup>1</sup>, Giulia Cesarini<sup>1\*</sup>, Loris Pietrelli<sup>2</sup>, Massimiliano Scalici<sup>1</sup>

#### Authors' addresses:

<sup>1</sup> University of Roma Tre, Department of Sciences, Viale G. Marconi 446, 00146 Rome, Italy

<sup>2</sup> Sapienza University of Rome, Department of Chemistry, P.le A. Moro, 5, 00185 Rome, Italy

\* Corresponding author: giulia.cesarini@uniroma3.it

#### Content

**Table S1.** Biometries (length, width, weight, volume) of natural cases and number of large microplastics (IMP) occurred in *Odontocerum albicorne* cases.

**Table S2.** Colour and shape of large microplastics (fragments, fibres, films) occurred in each natural case of *Odontocerum albicorne*.

**Figure S1.** FTIR spectrum of polyester fiber found in natural cases of *Odontocerum albicorne*.

**Figure S2.** Relative amount (%) of microplastic polymer materials (polyamide; polyester; polyacrylic; PE: polyethylene; PP: polypropylene; PS: polystyrene; PVC: polyvinylchloride) of fragments and fibres found in natural case of *Odontocerum albicorne*.

**Table S3.** Biometries (length, width, volume) of artificial cases rebuilt by *Odontocerum albicorne* during experiment 1 (EXP1).

**Table S4.** Biometries (length, width, volume) of artificial cases rebuilt by *Odontocerum albicorne* during experiment 2 (EXP2).

**Table S5.** Biometries (length, width, volume, weight, density) of artificial cases rebuilt by *Odontocerum albicorne* during experiment 3 (EXP3). n.a.= measures not available.

**Table S6.** Body length (cm) of *Ephemera danica* burrowed in different substrates. NAT = natural substrate, MIX = mixture of natural and microplastic substrates, IMP = microplastic substrate.

**Table S1.** Biometries (length, width, weight, volume) of natural cases and number of large microplastics (IMP) occurred in *Odontocerum albicorne* cases.

| Natural cases |             |            |            |                           |               |
|---------------|-------------|------------|------------|---------------------------|---------------|
| caddisfly ID  | length (cm) | width (cm) | weight (g) | volume (cm <sup>3</sup> ) | number of IMP |
| 1             | 1.83        | 0.63       | 0.2        | 0.57                      | 26            |
| 2             | 2.55        | 0.78       | 0.4        | 1.22                      | 54            |
| 3             | 2.62        | 0.66       | 0.3        | 0.90                      | 51            |
| 4             | 2.41        | 0.58       | 0.3        | 0.64                      | 28            |
| 5             | 2.39        | 0.58       | 0.2        | 0.63                      | 13            |
| 6             | 2.16        | 0.60       | 0.3        | 0.61                      | 41            |
| 7             | 1.99        | 0.81       | 0.5        | 1.02                      | 13            |
| 8             | 1.94        | 0.64       | 0.2        | 0.62                      | 16            |
| 9             | 2.65        | 0.67       | 0.3        | 0.93                      | 9             |
| 10            | 2.27        | 0.59       | 0.2        | 0.62                      | 10            |
| 11            | 1.99        | 0.69       | 0.2        | 0.74                      | 29            |
| 12            | 2.75        | 0.61       | 0.2        | 0.80                      | 12            |
| 13            | 1.92        | 0.52       | 0.1        | 0.41                      | 2             |
| 14            | 2.13        | 0.62       | 0.2        | 0.64                      | 5             |
| 15            | 2.13        | 0.66       | 0.3        | 0.73                      | 11            |
| 16            | 1.94        | 0.54       | 0.2        | 0.44                      | 5             |
| 17            | 2.28        | 0.68       | 0.4        | 0.83                      | 13            |
| 18            | 2.23        | 0.61       | 0.3        | 0.65                      | 3             |
| 19            | 2.43        | 0.66       | 0.3        | 0.83                      | 12            |
| 20            | 2.65        | 0.61       | 0.4        | 0.77                      | 9             |
| 21            | 2.44        | 0.57       | 0.4        | 0.62                      | 4             |
| 22            | 2.84        | 0.74       | 0.4        | 1.22                      | 10            |
| 23            | 2.68        | 0.66       | 0.4        | 0.92                      | 21            |
| 24            | 2.48        | 0.64       | 0.3        | 0.80                      | 21            |
| 25            | 2.55        | 0.59       | 0.4        | 0.70                      | 10            |
| 26            | 1.86        | 0.52       | 0.1        | 0.39                      | 14            |
| 27            | 2.83        | 0.58       | 0.4        | 0.75                      | 16            |

**Table S2.** Colour and shape of large microplastics (fragments, fibres, films) occurred in each natural case of *Odontocerum albicorne*.

| caddisfly ID | Natural cases |          |           |          |          |            |           |           |           |            |          |
|--------------|---------------|----------|-----------|----------|----------|------------|-----------|-----------|-----------|------------|----------|
|              | fragments     |          |           |          |          | fibres     |           |           |           |            | films    |
|              | blue          | red      | white     | green    | black    | blue       | red       | white     | green     | black      | white    |
| 1            | 0             | 0        | 0         | 0        | 0        | 10         | 4         | 0         | 1         | 11         | 0        |
| 2            | 1             | 0        | 0         | 0        | 0        | 40         | 7         | 0         | 0         | 5          | 1        |
| 3            | 2             | 0        | 0         | 0        | 0        | 27         | 7         | 0         | 1         | 14         | 0        |
| 4            | 1             | 0        | 5         | 0        | 0        | 11         | 2         | 0         | 4         | 5          | 0        |
| 5            | 0             | 0        | 1         | 0        | 0        | 4          | 0         | 0         | 3         | 5          | 0        |
| 6            | 0             | 0        | 0         | 1        | 0        | 14         | 6         | 1         | 7         | 12         | 0        |
| 7            | 0             | 0        | 0         | 1        | 0        | 9          | 1         | 0         | 0         | 2          | 0        |
| 8            | 2             | 0        | 0         | 0        | 0        | 6          | 1         | 0         | 0         | 7          | 0        |
| 9            | 0             | 0        | 0         | 0        | 0        | 5          | 0         | 3         | 1         | 0          | 0        |
| 10           | 0             | 0        | 0         | 0        | 1        | 5          | 1         | 0         | 0         | 3          | 0        |
| 11           | 0             | 0        | 1         | 0        | 0        | 14         | 3         | 4         | 1         | 6          | 0        |
| 12           | 0             | 0        | 1         | 0        | 0        | 7          | 0         | 0         | 0         | 4          | 0        |
| 13           | 0             | 0        | 0         | 0        | 0        | 2          | 0         | 0         | 0         | 0          | 0        |
| 14           | 0             | 0        | 0         | 0        | 0        | 0          | 0         | 0         | 0         | 5          | 0        |
| 15           | 0             | 0        | 2         | 0        | 0        | 2          | 1         | 0         | 0         | 6          | 0        |
| 16           | 0             | 0        | 2         | 0        | 0        | 0          | 0         | 0         | 1         | 2          | 0        |
| 17           | 0             | 0        | 0         | 0        | 0        | 3          | 2         | 0         | 0         | 8          | 0        |
| 18           | 0             | 0        | 0         | 0        | 0        | 2          | 0         | 0         | 0         | 1          | 0        |
| 19           | 1             | 0        | 0         | 0        | 1        | 8          | 0         | 0         | 0         | 2          | 0        |
| 20           | 0             | 0        | 0         | 0        | 0        | 3          | 1         | 1         | 0         | 4          | 0        |
| 21           | 0             | 0        | 0         | 0        | 0        | 1          | 0         | 0         | 0         | 3          | 0        |
| 22           | 2             | 0        | 0         | 0        | 0        | 5          | 0         | 0         | 0         | 3          | 0        |
| 23           | 0             | 0        | 0         | 0        | 0        | 17         | 2         | 0         | 0         | 2          | 0        |
| 24           | 1             | 1        | 0         | 0        | 0        | 13         | 3         | 0         | 0         | 3          | 0        |
| 25           | 2             | 0        | 0         | 0        | 0        | 2          | 3         | 1         | 0         | 2          | 0        |
| 26           | 1             | 0        | 0         | 0        | 0        | 6          | 2         | 0         | 0         | 5          | 0        |
| 27           | 0             | 0        | 0         | 0        | 0        | 5          | 1         | 1         | 0         | 9          | 0        |
| <b>total</b> | <b>13</b>     | <b>1</b> | <b>12</b> | <b>2</b> | <b>2</b> | <b>221</b> | <b>47</b> | <b>11</b> | <b>19</b> | <b>129</b> | <b>1</b> |

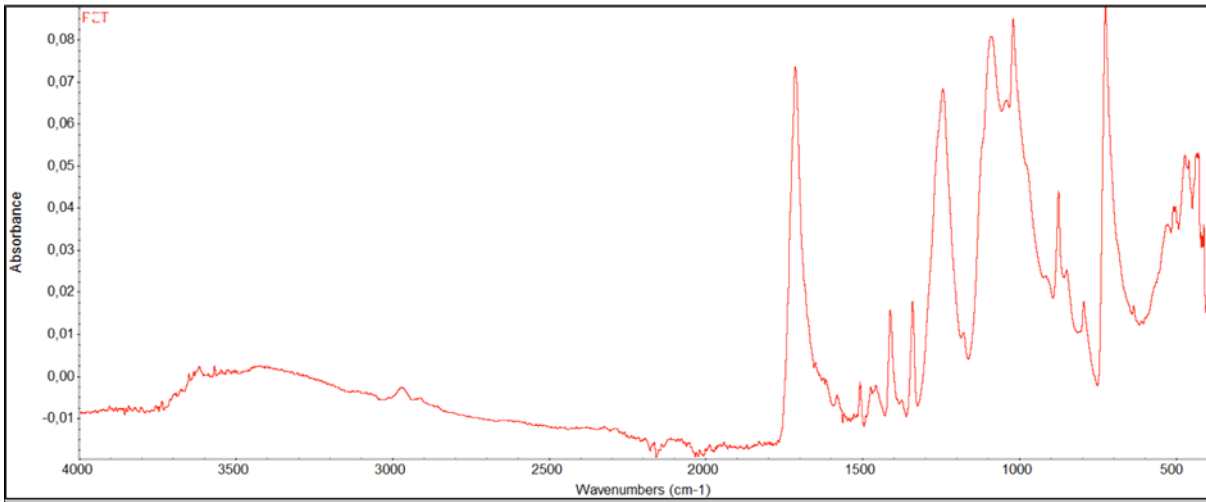

**Figure S1.** FTIR spectrum of polyester fiber found in natural cases of *Odontoceram albicorne*.

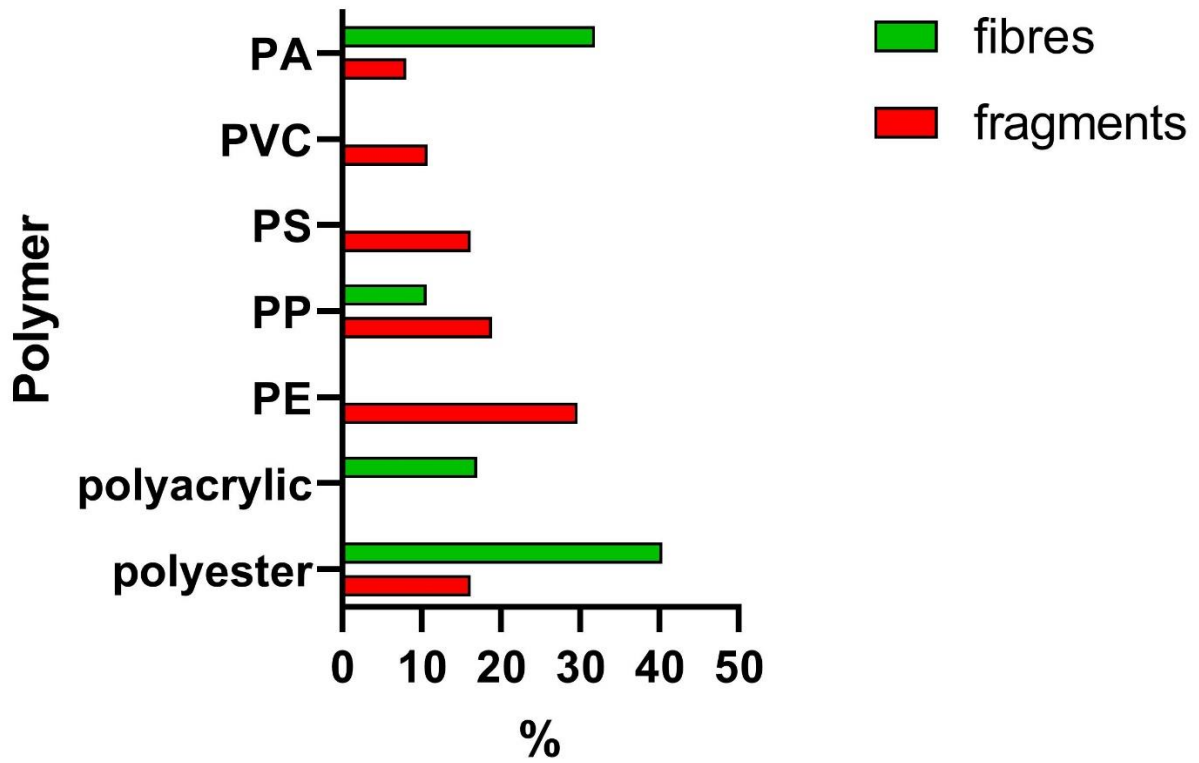

**Figure S2.** Relative amount (%) of microplastic polymer materials (polyester; polyacrylic; PE: polyethylene; PP: polypropylene; PS: polystyrene; PVC: polyvinylchloride; PA: polyamide) of fragments and fibres found in natural cases of *Odontoceram albicorne*.

**Table S3.** Biometrics (length, width, volume) of artificial cases rebuilt by *Odontocerum albicorne* during experiment 1 (EXP1).

| Artificial cases EXP1 |             |            |                           |
|-----------------------|-------------|------------|---------------------------|
| caddisfly ID          | length (cm) | width (cm) | volume (cm <sup>3</sup> ) |
| 1                     | 0.50        | 0.28       | 0.03                      |
| 2                     | 0.72        | 0.44       | 0.11                      |
| 3                     | 1.33        | 0.34       | 0.12                      |
| 4                     | 0.50        | 0.40       | 0.06                      |

**Table S4.** Biometrics (length, width, volume) of artificial cases rebuilt by *Odontocerum albicorne* during experiment 2 (EXP2).

| Artificial cases EXP2 |             |            |                           |
|-----------------------|-------------|------------|---------------------------|
| caddisfly ID          | length (cm) | width (cm) | volume (cm <sup>3</sup> ) |
| 1                     | 0.81        | 0.48       | 0.15                      |
| 2                     | 0.45        | 0.36       | 0.05                      |
| 3                     | 0.39        | 0.17       | 0.01                      |

**Table S5.** Biometrics (length, width, volume, weight, density) of artificial cases rebuilt by *Odontocerum albicorne* during experiment 3 (EXP3). n.a.= measures not available.

| Artificial cases EXP3 |             |            |                           |            |                              |
|-----------------------|-------------|------------|---------------------------|------------|------------------------------|
| caddisfly ID          | length (cm) | width (cm) | volume (cm <sup>3</sup> ) | weight (g) | density (g/cm <sup>3</sup> ) |
| 1                     | 1.35        | 1.29       | 1.76                      | 0.4        | 0.23                         |
| 2                     | 2.03        | 1.23       | 2.41                      | 0.5        | 0.21                         |
| 3                     | 1.37        | 0.95       | 0.97                      | 0.3        | 0.31                         |
| 4                     | 3.15        | 1.12       | 3.10                      | 0.6        | 0.19                         |
| 5                     | 2.19        | 1.05       | 1.90                      | 0.8        | 0.42                         |
| 6                     | 2.37        | 1.03       | 1.97                      | 0.7        | 0.35                         |
| 7                     | n.a.        | n.a.       | n.a.                      | 0.7        | n.a.                         |
| 8                     | 1.85        | 0.87       | 1.10                      | 0.2        | 0.18                         |

**Table S6.** Body length (cm) of *Ephemera danica* burrowed in different substrates. NAT = natural substrate, MIX = mixture of natural and microplastic substrates, IMP = microplastic substrate.

| Body length of mayflies occurred in each substrate |      |      |
|----------------------------------------------------|------|------|
| NAT                                                | MIX  | IMP  |
| 1.23                                               | 1.14 | 1.22 |
| 1.41                                               | 1.29 | 1.24 |
| 1.44                                               | 1.35 | 1.30 |
| 1.45                                               | 1.40 | 1.33 |
| 1.51                                               | 1.42 | 1.33 |
| 1.52                                               | 1.46 | 1.39 |
| 1.55                                               | 1.50 | 1.42 |
| 1.62                                               | 1.52 | 1.44 |
| 1.62                                               | 1.52 | 1.46 |
| 1.63                                               | 1.53 | 1.47 |
| 1.66                                               | 1.54 | 1.52 |
| 1.73                                               | 1.56 | 1.53 |
| 1.73                                               | 1.57 | 1.53 |
| 1.75                                               | 1.61 | 1.56 |
| 1.80                                               | 1.67 | 1.59 |
| 1.81                                               | 1.69 | 1.60 |
| 1.84                                               | 1.69 | 1.62 |
| 2.01                                               | 1.71 | 1.62 |
| 2.01                                               | 1.72 | 1.64 |
| 2.02                                               | 1.76 | 1.65 |
| 2.12                                               | 1.8  | 1.68 |
| 2.40                                               | 1.80 | 1.71 |
| 2.58                                               | 1.82 | 1.77 |
| -                                                  | 1.85 | 1.77 |
| -                                                  | 1.93 | 1.77 |
| -                                                  | 1.98 | 1.78 |
| -                                                  | 1.99 | 1.81 |
| -                                                  | 2.01 | 1.81 |
| -                                                  | 2.05 | 1.81 |
| -                                                  | 2.07 | 1.91 |
| -                                                  | 2.15 | 1.91 |
| -                                                  | 2.16 | 1.92 |
| -                                                  | 2.16 | 1.93 |
| -                                                  | 2.19 | 1.93 |
| -                                                  | 2.21 | 1.95 |
| -                                                  | 2.21 | 1.97 |
| -                                                  | 2.22 | 2.08 |
| -                                                  | 2.26 | 2.11 |
| -                                                  | -    | 2.22 |
| -                                                  | -    | 2.27 |
| -                                                  | -    | 2.27 |
| -                                                  | -    | 2.29 |
| -                                                  | -    | 2.34 |
| -                                                  | -    | 2.54 |
| -                                                  | -    | 2.60 |
